# Supplementary material for: An operando emission spectroscopy study of Pt/Al2O3 and Pt/CeO2/Al2O3
Source: Royal Society of Chemistry journal article supplement (doi:10.1039/c6cp05992a), 2016-01-01
Supplement: c6cp05992a1.pdf [file c6cp05992a1.pdf]

**Supporting information material to**

**An emission spectroscopy study of Pt/Al<sub>2</sub>O<sub>3</sub> and**

**Pt/CeO<sub>2</sub>/Al<sub>2</sub>O<sub>3</sub>**

Valentina Marchionni,<sup>1,2</sup> Jakub Szlachetko,<sup>1,3</sup> Maarten Nachtegaal,<sup>1</sup> Anastasios Kambolis,<sup>1</sup> Oliver

Kröcher,<sup>1,4</sup> Davide Ferri<sup>1\*</sup>

<sup>1</sup> Paul Scherrer Institut, CH-5232 Villigen PSI, Switzerland

<sup>2</sup> ETH Zurich, Institute for Chemical and Bioengineering, CH-8093 Zurich, Switzerland

<sup>3</sup> Jan Kochanowski University, Institute of Physics, PL-25-406 Kielce, Poland

<sup>4</sup> École polytechnique fédérale de Lausanne (EPFL), Institute of Chemical Science and Engineering, CH-1015 Lausanne, Switzerland

\* Corresponding author.

Phone: +41 56 310 27 81

e-mail: [davide.ferri@psi.ch](mailto:davide.ferri@psi.ch)

## Reference spectra for RXES

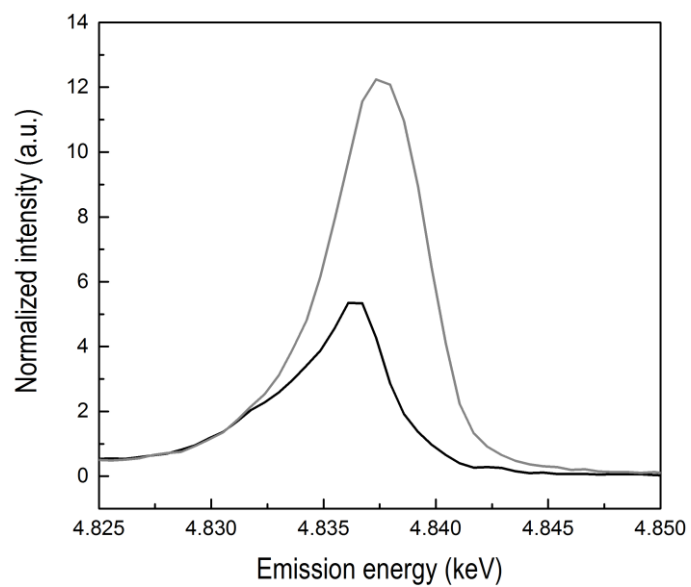

**Figure S1.** RXES spectra of calcined Pt/CeO<sub>2</sub>/Al<sub>2</sub>O<sub>3</sub> at room temperature in Ar (black, oxidized state) and after the H<sub>2</sub>-TPR in 5 vol% H<sub>2</sub>/Ar at 300°C (grey, reduced state).

**Not normalized HEROS spectra collected during 1 vol% H<sub>2</sub> – 1 vol% O<sub>2</sub> modulation experiments**

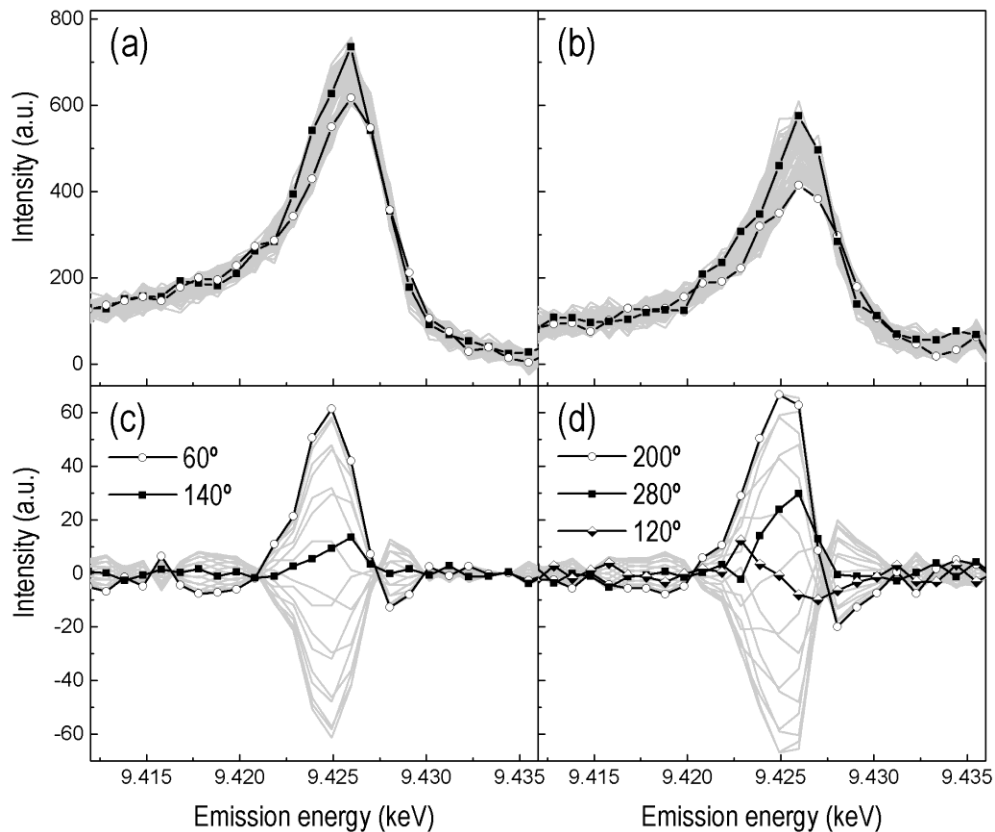

**Figure S2.** (a,b) Time-resolved and (c,d) phase-resolved HEROS spectra collected at the Pt L<sub>3</sub>-edge during the 1 vol% H<sub>2</sub>/He-1 vol% O<sub>2</sub>/He modulation experiment (period 30+30 s, 120 cycles; 500 ms/spectrum) at 300°C on (a,c) Pt/Al<sub>2</sub>O<sub>3</sub> and (b,d) Pt/CeO<sub>2</sub>/Al<sub>2</sub>O<sub>3</sub>.

### Comparison of 4 vol% H<sub>2</sub> – 4 vol% O<sub>2</sub> and 1 vol% H<sub>2</sub> – 1 vol% O<sub>2</sub> modulation experiments

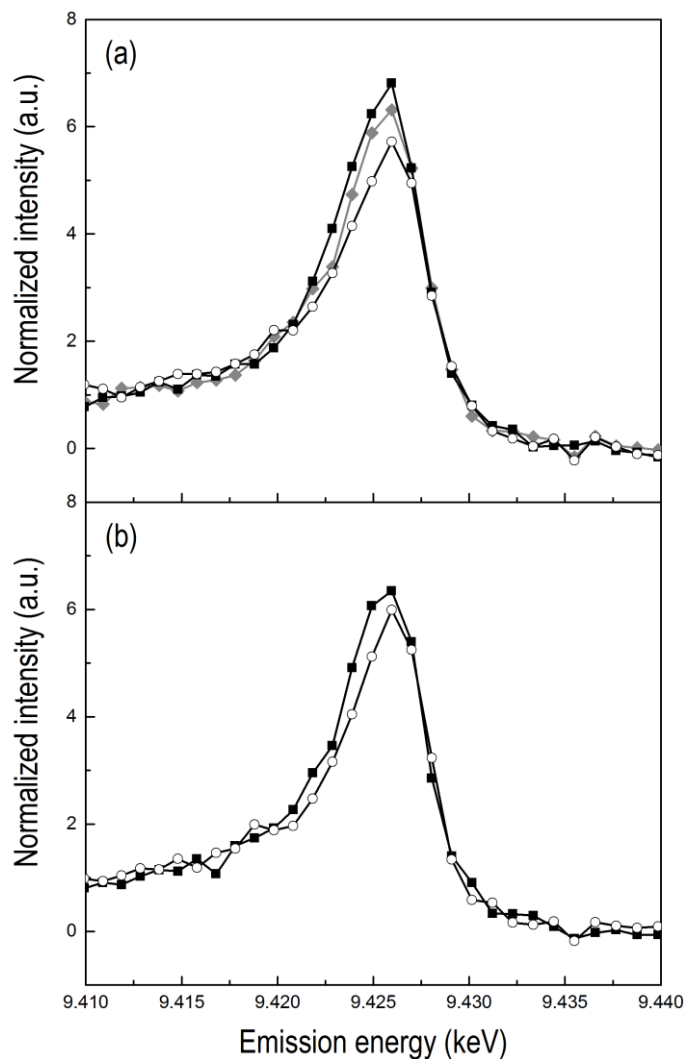

**Figure S3.** Selected time-resolved HEROS spectra collected during (a) 4 vol% H<sub>2</sub>/He - 4 vol% O<sub>2</sub>/He and (b) 1 vol% H<sub>2</sub>/He - 1 vol% O<sub>2</sub>/He modulation experiments on Pt/Al<sub>2</sub>O<sub>3</sub> at 300°C. (○) Final reduced state, (◊) intermediate oxidized state and (■) final oxidized state.

Comparison of 4 vol% CO – 4 vol% O<sub>2</sub> and 1 vol% CO – 1 vol% O<sub>2</sub> modulation experiments

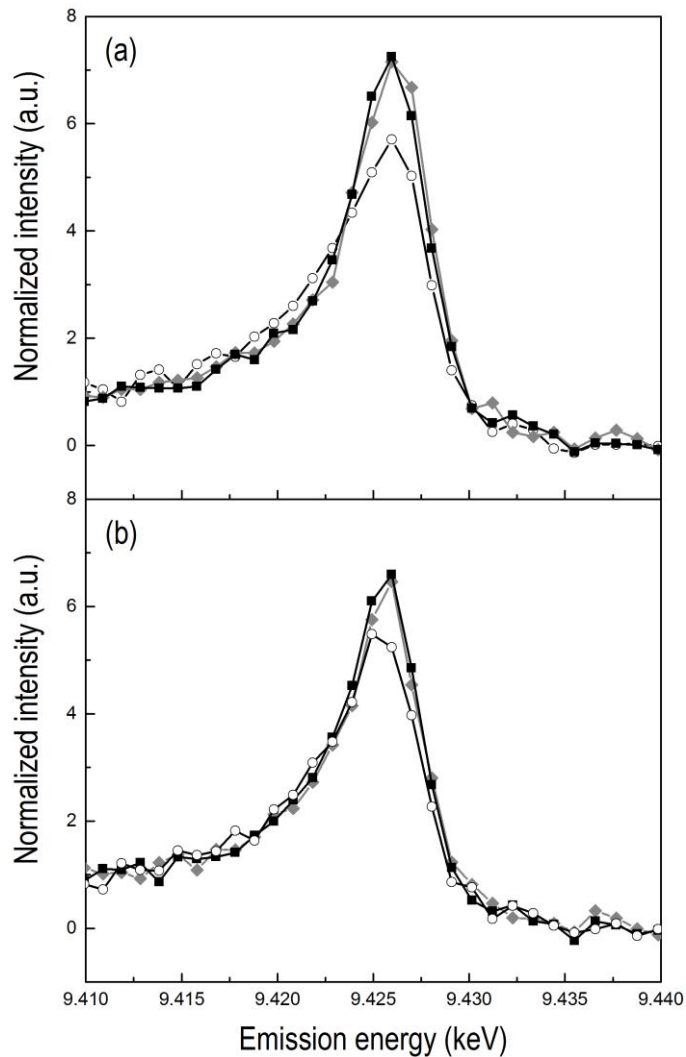

**Figure S4.** Selected time-resolved HEROS spectra collected during (a) 4 vol% CO/He - 4 vol% O<sub>2</sub>/He and (b) 1 vol% CO/He - 1 vol% O<sub>2</sub>/He modulation experiments on Pt/Al<sub>2</sub>O<sub>3</sub> at 300°C. (○) Final reduced state, (◇) intermediate oxidized state and (■) final oxidized state.

### DRIFTS CO-O<sub>2</sub> modulation experiment

The 1 vol% CO/He-1 vol% O<sub>2</sub>/He modulation experiment was performed on Pt/Al<sub>2</sub>O<sub>3</sub> at 300°C by collecting DRIFT spectra under identical experimental conditions to those discussed in the main manuscript. **Figure S1** shows that in the CO pulse CO adsorbs mainly as linearly bound CO on reduced Pt sites (2060 cm<sup>-1</sup>). Simultaneously, a shoulder appears at 2077 cm<sup>-1</sup> that is due to linearly adsorbed CO on single Pt atoms with higher coordination degree. A third signal grows with some delay at 1999 cm<sup>-1</sup> that is attributed to linearly CO adsorption on poorly coordinated Pt atoms. A smaller fraction of twofold bridged coordinated CO is characterized by the broad band at 1782 cm<sup>-1</sup>, which agrees well with the presence of Pt particles of 2-3 nm diameter (Figure 3a). During the subsequent oxidation pulse, the shoulder at 1999 cm<sup>-1</sup> is the first signal to disappear completely and no adsorbed CO is overserved at the end of the pulse.

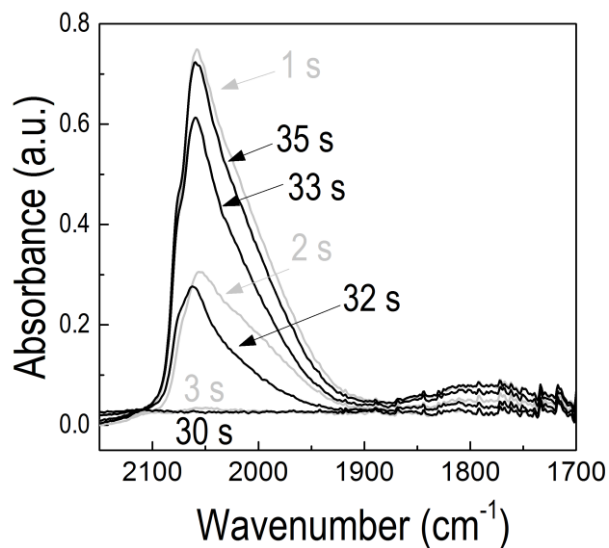

**Figure S5.** Selected averaged DRIFT spectra obtained in 1 vol% CO (black) and 1 vol% O<sub>2</sub> (grey) during the modulation experiment on Pt/Al<sub>2</sub>O<sub>3</sub> at 300°C.
